# Supplementary material for: Rapid determination of vitamin B12(cobalamin) based on silver nanoclusters capped by polyethyleneimine with different molecular weights and terminal groups
Source: Royal Society of Chemistry journal article supplement (doi:10.1039/c6ay00088f), 2016-01-01
Supplement: c6ay00088f1.pdf [file c6ay00088f1.pdf]

**Supplementary Information for**  
**Rapid determination of vitamin B<sub>12</sub> (cobalamin) based on silver**  
**nanoclusters capped by polyethyleneimine with different**  
**molecular weights and terminal groups**

Fei Qu<sup>a,b,\*</sup>, Qianwei Song<sup>a,b</sup>, Jinmao You<sup>a,b,c\*</sup>

<sup>a</sup> The Key Laboratory of Life-Organic Analysis, Qufu Normal University, Qufu  
273165, Shandong, China

<sup>b</sup> Key Laboratory of Pharmaceutical Intermediates and Analysis of Natural Medicine,  
Qufu Normal University, Qufu 273165, Shandong, China

<sup>c</sup> Northwest Institute of Plateau Biology, Chinese Academy of Sciences, Xining  
810001, China

\* Corresponding authors: qufei3323@163.com; jmyou6304@163.com

## Experimental section

### Chemicals and reagents

Silver nitrate ( $\text{AgNO}_3$ ), hyperbranched polyethylenimine (PEI) (Mw 600, 10000, 70000 and terminated by ethylenediamine (EDA)), agarose, formaldehyde (35 wt %), 4-(2-hydroxyethyl)-1-piperazineethanesulfonic acid (HEPES), vitamin  $\text{B}_{12}$  ( $\text{VB}_{12}$ ), nicotinic acid ( $\text{VB}_3$ ), (+)-pantothenic acid calcium salt hydrate ( $\text{VB}_5$ ), D-biotin ( $\text{VB}_7$ ), ascorbic acid (VC), ergocalciferol ( $\text{VD}_2$ ), cholecalciferol ( $\text{VD}_3$ ), vitamin  $\text{K}_1$  ( $\text{VK}_1$ ) and menadione ( $\text{VK}_3$ ) were purchased from Aladdin Reagent Co., Ltd. (China). Thiamine hydrochloride ( $\text{VB}_1$ ), pyridoxine hydrochloride ( $\text{VB}_6$ ), ( $\pm$ )- $\alpha$ -tocopherol (VE) and PEI terminated by ethoxylated groups (EOD) were obtained from Sigma-aldrich (China). The  $\text{VB}_{12}$  injections (0.50 mg/mL) and tablets (25  $\mu\text{g}$ ) were bought from a local drug store. All reagents used were of at least analytical reagent grade. The water used was purified through a millipore system.

### Apparatus

All fluorescence spectra were recorded on a Hitachi F-7000 fluorescence spectrophotometer. The photomultiplier tube (PMT) voltage was set at 400 V and the slit width was 10 and 10 nm for excitation and emission respectively. The ultraviolet-visible (UV-vis) absorption spectra were obtained on a Cary 300 Bio UV-vis spectrophotometer. Transmission electron microscopy (TEM) and high-resolution transmission electron microscopy (HRTEM) of Ag nanoclusters (Ag NCs) were carried out on a JEM-2100F electron microscope. The X-ray

photoelectron spectroscopy (XPS) measurements were performed on a Thermo Scientific Escalab 250 photoelectron spectrometer.

### **Synthesis of Ag NCs**

In previous literature, Ag NCs capped by PEI (Ag NC-PEIs) with different molecular weights were successfully synthesized.<sup>1,2</sup> Herein, we further synthesized two Ag NCs capped by PEI with different terminal groups named as ethylenediamine (EDA) and ethoxylated groups (EOD). The synthetic procedures were similar to that reported before.<sup>1,2</sup> Firstly, PEI was dissolved in deionized water by stirring for 2 min, and then with the addition of a certain amount of AgNO<sub>3</sub>, the solution was stirred for 2 min. Last, the mixtures were reduced with freshly prepared formaldehyde solution by vigorously shaking for approximately 2 min. The color of the mixture changed from colorless to yellow. The final solution was stored in the dark at ambient environment for at least 4 days before its further application. The detailed amounts of AgNO<sub>3</sub>, various PEIs, and formaldehyde were shown in Table S1.

### **VB<sub>12</sub> detection**

In the quenching studies, different concentrations of VB<sub>12</sub> solutions were prepared before detection. First of all, 0.15  $\mu$ L of as-prepare Ag NC-PEIs, 200  $\mu$ L of HEPES (pH=7.81) and various concentrations of VB<sub>12</sub> were mixed together. Then the mixed solution was diluted to 1 mL with deionized water. The working solution was well shaken and allowed to stand for 5 min before fluorescence measurements. The effect of probe concentration, pH, reaction time and temperature were investigated by

adding 20  $\mu\text{M}$   $\text{VB}_{12}$  using Ag NC-PEI-EDA as probe. Finally, the fluorescence intensity of Ag NC-PEIs in the absence of  $\text{VB}_{12}$  ( $F_0$ ) and in the presence of  $\text{VB}_{12}$  ( $F$ ) were recorded, respectively, and the fluorescence quenching efficiency was expressed as  $\Delta F = (F_0 - F) / F_0$ .

### **Selectivity**

The process of selectivity was similar to the aforementioned assay of  $\text{VB}_{12}$ . Briefly, 0.15  $\mu\text{L}$  of as-prepare Ag NC-PEIs, 200  $\mu\text{L}$  of HEPES ( $\text{pH}=7.81$ ) and the various vitamins were mixed together, and then these solutions were diluted to 1 mL with deionized water. Furthermore, due to the different solubility of these vitamins, ethanol was selected to dissolve  $\text{VD}_2$ ,  $\text{VD}_3$ ,  $\text{VE}$  and  $\text{VK}_3$ , whereas  $\text{VK}_1$  was prepared in dimethyl sulfoxide (DMSO).

### **Analysis of real samples**

In this assay, we selected  $\text{VB}_{12}$  injections and tablets samples to evaluate the sensor performance. The injections were diluted 15 times for detection. The tablets should be incubated at 100  $^{\circ}\text{C}$  for two hours to remove sugar; next, they were powdered and dissolved in deionized water; then the mixtures were centrifugated to obtain supernatant for determination. Other steps were completed as described above.

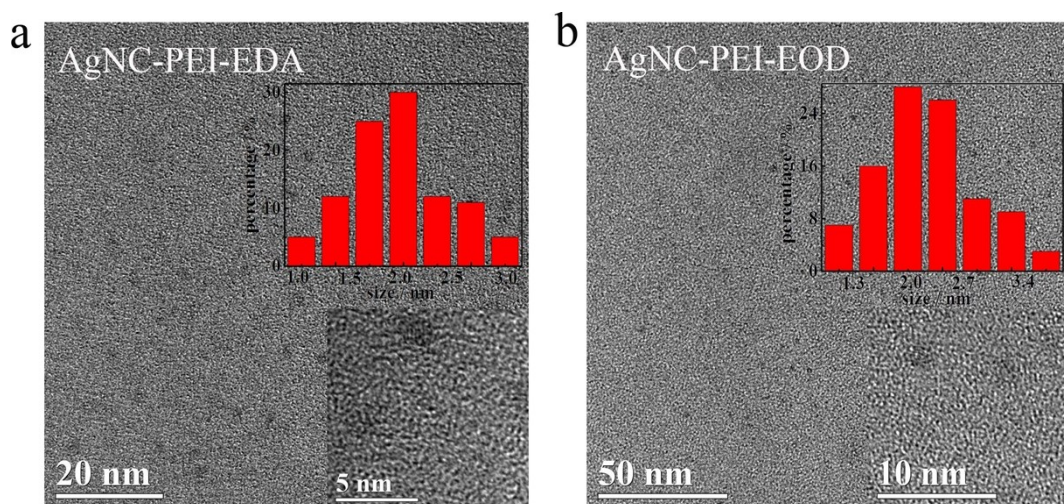

**Fig. S1** TEM and HRTEM images of Ag NC-PEI-EDA (a) and Ag NC-PEI-EOD (b).

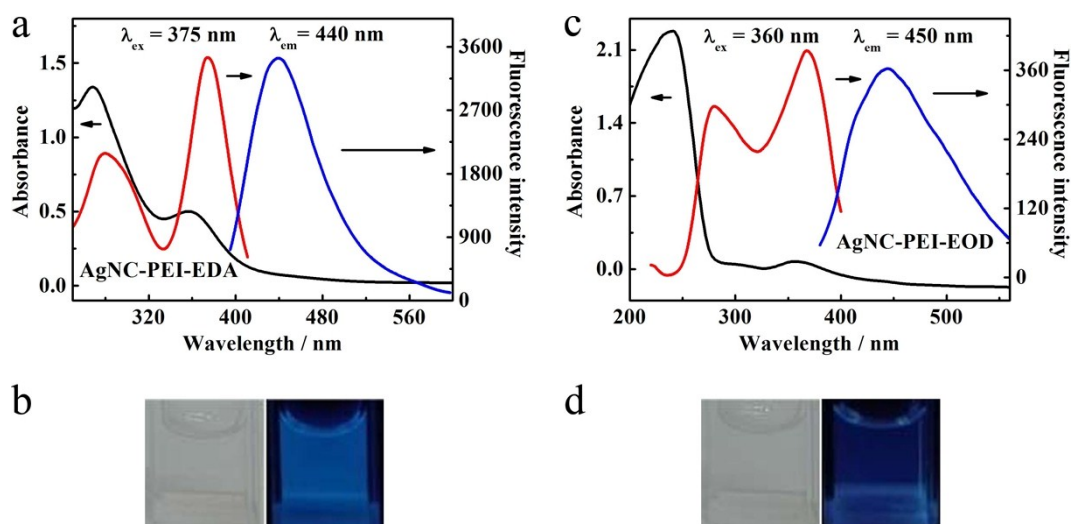

**Fig. S2** UV-vis absorption spectrum, excitation spectrum and emission spectrum of Ag NC-PEI-EDA (a) and Ag NC-PEI-EOD (c). The corresponding photographs of Ag NC-PEI-EDA (b) and Ag NC-PEI-EOD (d) under visible light and UV light at 365 nm. The concentration of Ag NC-PEI-EDA was 5  $\mu$ L/mL for fluorescence spectra and UV-vis absorption, and for Ag NC-PEI-EOD the concentration was 500  $\mu$ L/mL.

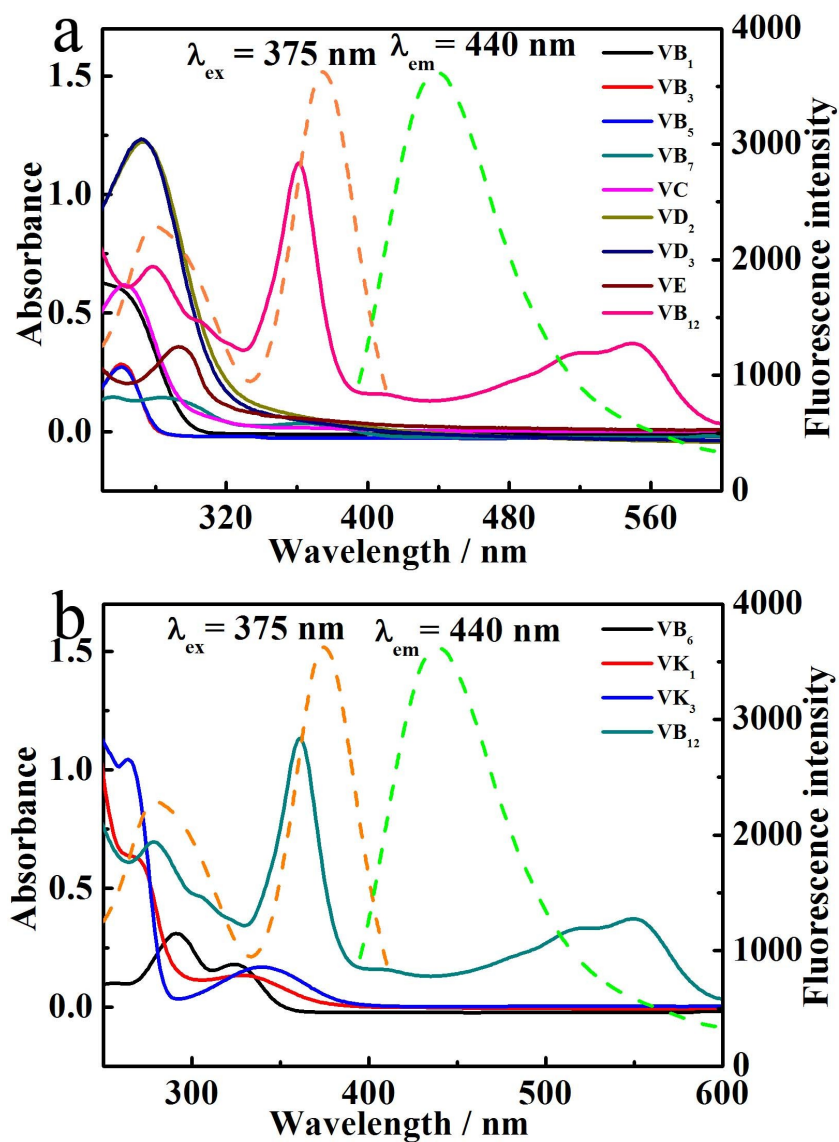

**Fig. S3** Fluorescence excitation and emission spectra(dotted line) of 5  $\mu\text{L/mL}$  Ag NC-PEI-EDA and absorption spectra (solid line) of 60  $\mu\text{M}$  VB<sub>1</sub>, VB<sub>3</sub>, VB<sub>5</sub>, VB<sub>7</sub>, VC, VD<sub>2</sub>, VD<sub>3</sub>, VE and VB<sub>12</sub> (a). Fluorescence excitation and emission spectra (dotted line) of Ag NC-PEI-EDA (5  $\mu\text{L/mL}$ ) and absorption spectra (solid line) of 60  $\mu\text{M}$  VB<sub>6</sub>, VK<sub>1</sub> and VK<sub>3</sub> and VB<sub>12</sub> (b).

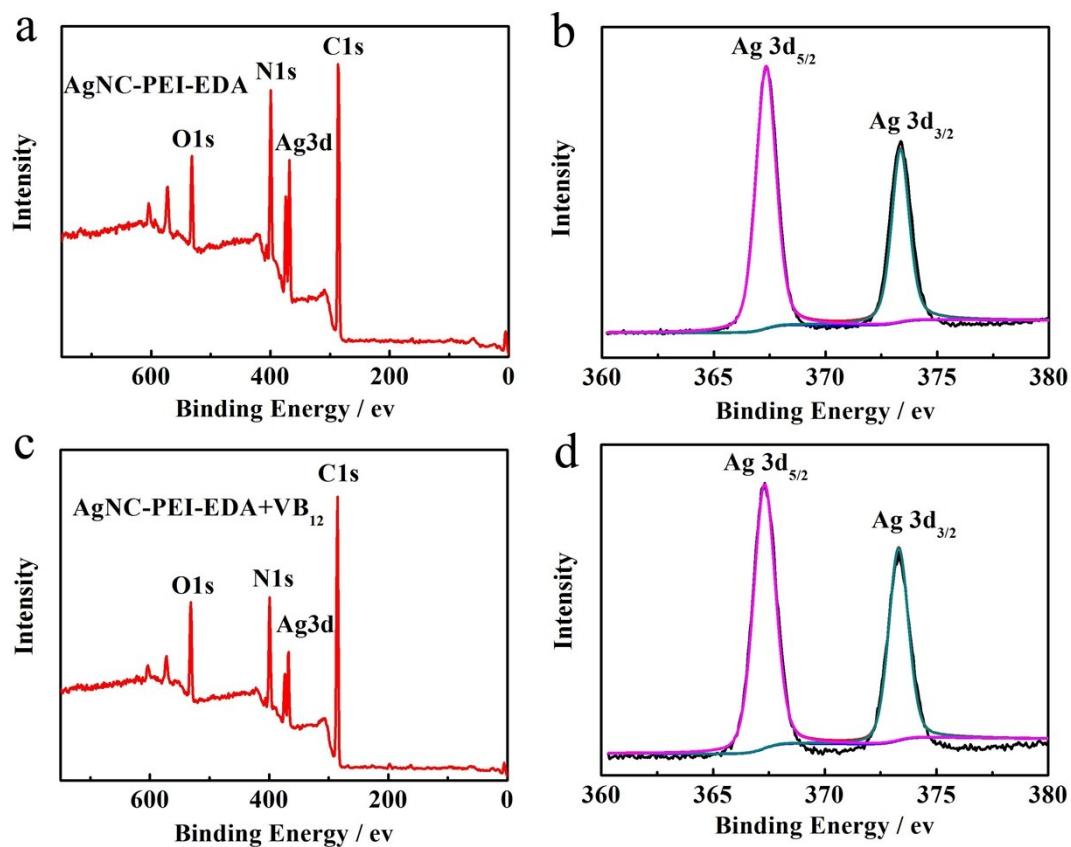

**Fig. S4** XPS spectra of Ag NC-PEI-EDA in the absence and presence of VB<sub>12</sub> and the corresponding Ag3d spectra (a and b, free Ag NC-PEI-EDA; c and d Ag NC-PEI-EDA in the presence of VB<sub>12</sub>)

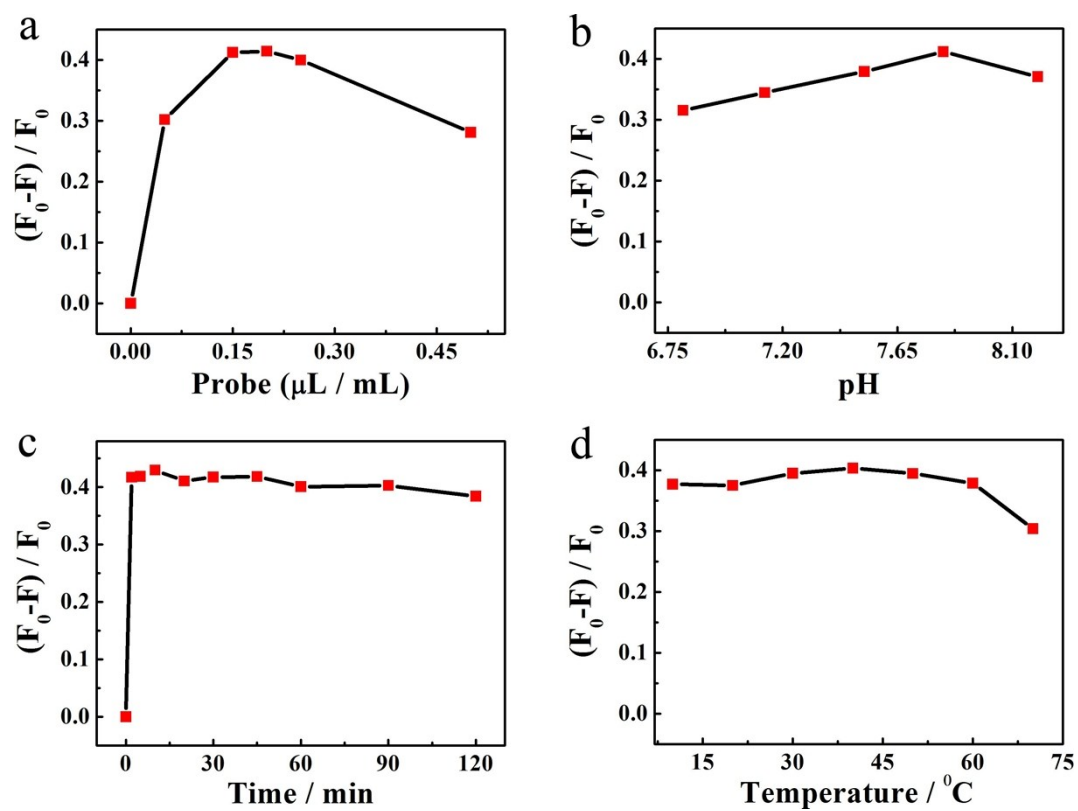

**Fig. S5** Optimization of reaction conditions for detecting VB<sub>12</sub> based on Ag NC-PEI-EDA (a, probe concentrations; b, pH values; c, reaction time; d, temperature).

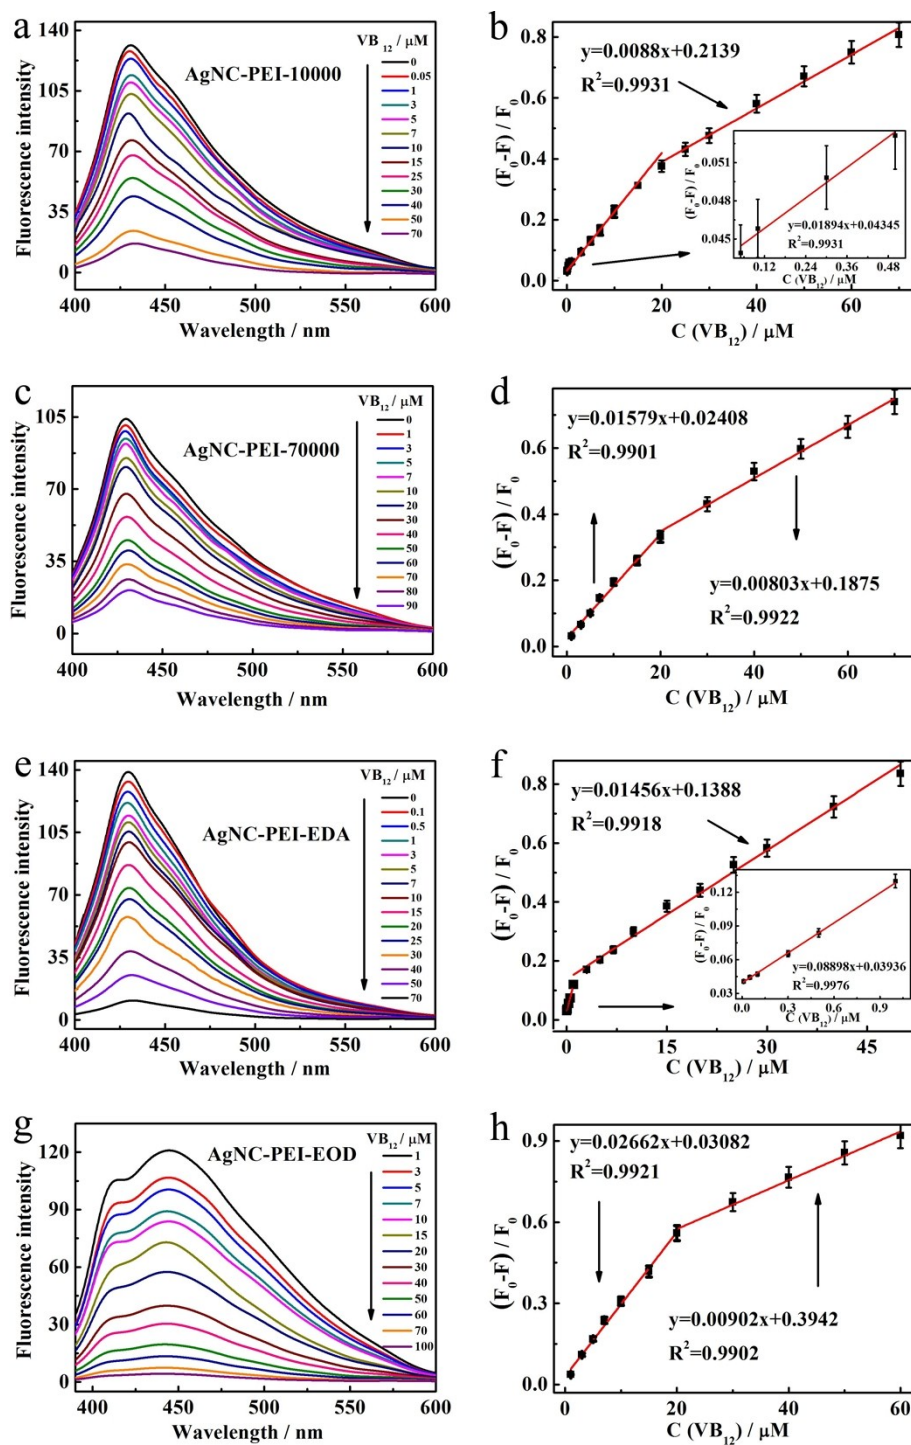

**Fig. S6** Fluorescence spectra of Ag NC-PEIs in the addition of different concentrations of  $VB_{12}$  and the corresponding linear ranges (a and b, Ag NC-PEI-10000; c and d, Ag NC-PEI-70000; e and f, AgNC-PEI-EDA; g and h, Ag NC-PEI-EOD; the inserts are the linear responses below 1  $\mu M$ ).

**Table S1.** The detailed amounts of AgNO<sub>3</sub>, PEIs, and formaldehyde used in the synthesis of Ag NC-PEIs.

| Ag NC-PEIs                   | PEI (g) | Water (μL) | AgNO <sub>3</sub> (mol) | HCHO (mol)           |
|------------------------------|---------|------------|-------------------------|----------------------|
| Mw 600                       | 0.0094  | 209        | $1.5 \times 10^{-5}$    | $9.3 \times 10^{-5}$ |
| Mw 10000                     | 0.0094  | 70         | $2.5 \times 10^{-5}$    | $8.0 \times 10^{-5}$ |
| Mw 70000                     | 0.0147  | 125        | $2.0 \times 10^{-5}$    | $7.0 \times 10^{-5}$ |
| Terminated EDA<br>(Mw 800)   | 0.0094  | 200        | $1.5 \times 10^{-5}$    | $1.0 \times 10^{-4}$ |
| Terminated EOD<br>(Mw 70000) | 0.1167  | 2620       | $2.0 \times 10^{-5}$    | $1.8 \times 10^{-4}$ |

**Table S2.** The influence of templates on the detection of VB<sub>12</sub> based on Ag NC-PEIs.

| Ag NC-PEIs                   | Linear equation      | Linear range          | LOD     |
|------------------------------|----------------------|-----------------------|---------|
| Mw 600                       | $y=0.02640x+0.05090$ | 5 nm-70 $\mu$ M       | 2.62 nM |
|                              | $y=0.007930x+0.2958$ |                       |         |
| Mw 10000                     | $y=0.01894x+0.04345$ | 50 nm-70 $\mu$ M      | 27 nM   |
|                              | $y=0.008800x+0.2139$ |                       |         |
| Mw 70000                     | $y=0.01579x+0.02408$ | 1 $\mu$ M -70 $\mu$ M | 745 nM  |
|                              | $y=0.008030x+0.1875$ |                       |         |
| Terminated EDA<br>(Mw 800)   | $y=0.08898x+0.03936$ | 10 nm-50 $\mu$ M      | 7.31 nM |
|                              | $y=0.01456x+0.1388$  |                       |         |
| Terminated EOD<br>(Mw 70000) | $y=0.02662x+0.03082$ | 1 $\mu$ M -60 $\mu$ M | 433 nM  |
|                              | $y=0.009020x+0.3942$ |                       |         |

## References

- 1 F. Qu, N. B. Li and H. Q. Luo, *Anal. Chem.*, 2012, **84**, 10373-10379.
- 2 F. Qu, X. Zou, R. Kong and J. You, *Talanta*., 2016, **146**, 549-555.
